# Supplementary material for: Shenfu injection attenuates cardiac dysfunction and inhibits apoptosis in septic mice
Source: PubMed Central journal article supplement — Ann Transl Med. 2022 May;10(10):597. doi: 10.21037/atm-22-836 (PMC9201198; doi:10.21037/atm-22-836), 2022-05
Supplement: atm-10-10-597-supplementary.pdf [file atm-10-10-597-supplementary.pdf]

**Table S1** Primers for qPCR

| Variables      | Forward                         | Reverse                        |
|----------------|---------------------------------|--------------------------------|
| TNF- $\alpha$  | 5'-GTGGAAGCTGGCAGAAGAGGC-3'     | 5'-AGACAGAAGAGCGTGGTGGC-3'     |
| IL-1 $\beta$   | 5'-GGAAGATTCTGAAGAAGAGACGG-3'   | 5'-TGAGATTTTGTAGTAACAGG-3'     |
| IL-6           | 5'-ACAAGTCGGAGGCTTAATTACACAT-3' | 5'-AATCAGAATTGCCATTGCACAA-3'   |
| MCP-1          | 5'-TGAGCCATGGGAAGAAGGAAGTCT-3'  | 5'-TGTGCTGGTCTGTGATAGGCACAT-3' |
| $\beta$ -actin | 5'-ATGTTTGAGACCTTCAACA-3'       | 5'-CACGTCAGACTTCATGATGG-3'     |

qPCR, quantitative polymerase chain reaction; TNF- $\alpha$ , tumor necrosis factor- $\alpha$ ; IL, interleukin; MCP-1, monocyte chemoattractant protein-1.

**Table S2** Cardiac function measured by echocardiography

| Variables          | Control              | Sham                 | LPS                 | LPS-SF-L            | LPS-SF-H             |
|--------------------|----------------------|----------------------|---------------------|---------------------|----------------------|
| LVESD (mm)         | 2.1 $\pm$ 0.2        | 2.2 $\pm$ 0.1        | 2.5 $\pm$ 0.4       | 2.4 $\pm$ 0.2       | 2.3 $\pm$ 0.3        |
| LVEDD (mm)         | 3.5 $\pm$ 0.3        | 3.5 $\pm$ 0.2        | 2.9 $\pm$ 0.4       | 3.11 $\pm$ 0.2      | 3.2 $\pm$ 0.2        |
| LVFS (%)           | 39.71 $\pm$ 4.4      | 37.71 $\pm$ 3.4      | 18.05 $\pm$ 3.6     | 22.09 $\pm$ 4.6     | 30.03 $\pm$ 2.1      |
| LVEF (%)           | 71.34 $\pm$ 5.2      | 69.87 $\pm$ 4.9      | 35.08 $\pm$ 5.9     | 43.21 $\pm$ 5.3     | 58.94 $\pm$ 4.2      |
| SV ( $\mu$ L)      | 28.9 $\pm$ 3.4       | 29.1 $\pm$ 2.8       | 11.3 $\pm$ 2.4      | 15.1 $\pm$ 1.7      | 22.4 $\pm$ 4.3       |
| CO ( $\mu$ L/min)  | 14,458.3 $\pm$ 405.6 | 13,443.1 $\pm$ 501.2 | 7,455.2 $\pm$ 670.3 | 9,029.5 $\pm$ 457.4 | 11,201.4 $\pm$ 563.1 |
| dP/dt max (mmHg/s) | 9,230.3 $\pm$ 45.7   | 9,012.4 $\pm$ 115.4  | 5,673.3 $\pm$ 74.7  | 6,230.7 $\pm$ 76.1  | 8,903.5 $\pm$ 65.8   |
| ESP (mmHg)         | 75.21 $\pm$ 5.7      | 76.33 $\pm$ 4.3      | 56.32 $\pm$ 4.6     | 61.32 $\pm$ 6.6     | 69.54 $\pm$ 4.9      |

SF, Shenfu injection; LPS, lipopolysaccharide; LVESD, left ventricular end-systolic diameter; LVEDD, left ventricular end-diastolic diameter; LVFS, left ventricular fractional shortening; LVEF, left ventricular ejection fraction; SV, stroke volume; CO, cardiac output; dP/dt, maximum rate of LV pressure rise; ESP, end-systolic pressure.
